# Supplementary material for: Controllable synthesis of CeO2 nanoparticles with different sizes and shapes and their application in NO oxidation
Source: Royal Society of Chemistry journal article supplement (doi:10.1039/c6ra04678a), 2016-01-01
Supplement: c6ra04678a1.pdf [file c6ra04678a1.pdf]

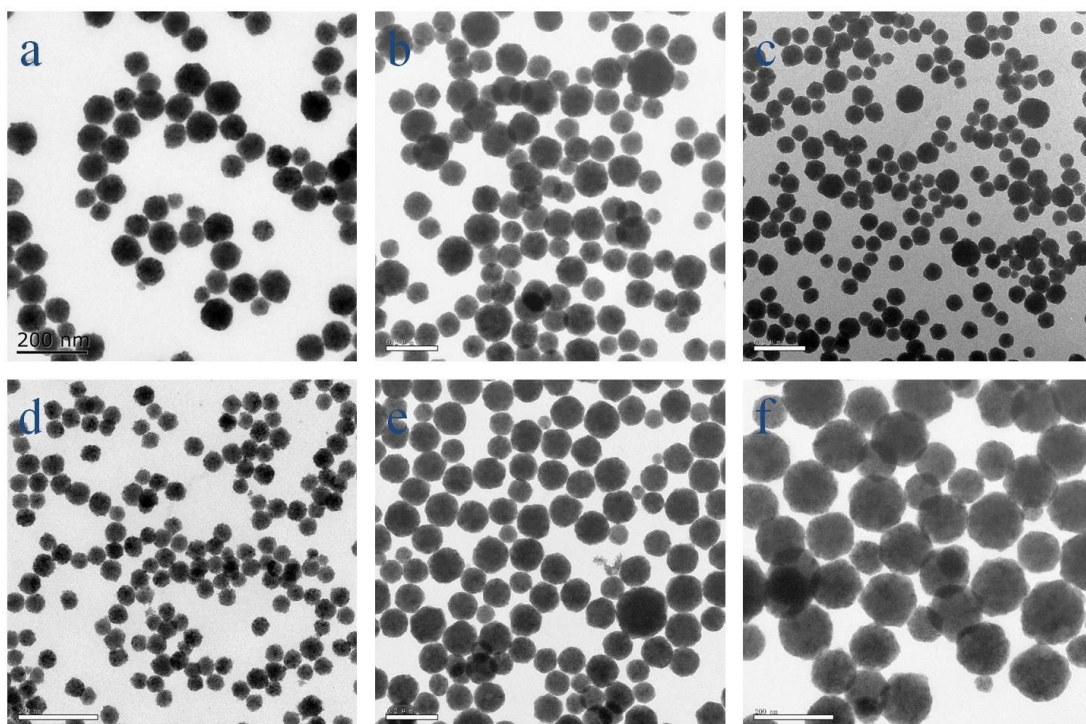

Fig. S1 TEM images of C2 hydrothermal treated for (a) 4 h, (b) 8 h, (c) 12 h, (d) 16 h, (e) 24 h and (f) 32 h.

Table S1 The surface area and pore structure parameters of C2-C7.

| Sample                                               | C2    | C3    | C4    | C5    | C6    | C7    |
|------------------------------------------------------|-------|-------|-------|-------|-------|-------|
| BET<br>( $\text{m}^2 \cdot \text{g}^{-1}$ )          | 79    | 70    | 60    | 69    | 55    | 70    |
| Pore size<br>(nm)                                    | 9.6   | 15.4  | 13.9  | 15.4  | 16.4  | 17.3  |
| Pore volume<br>( $\text{mm}^3 \cdot \text{g}^{-1}$ ) | 0.069 | 0.115 | 0.131 | 0.164 | 0.155 | 0.161 |

The BET surface area of C2-C7 are displayed in table S1. It was apparent that the specific surface declined as the Co content increased, C6 showed the smallest surface area among C2-C7. Although the specific surface decreased due to the addition of Co, the presence of Co provides more active sites for NO adsorption.

TPD experiments were conducted to test the reversibility of NO adsorption. The TPD profiles of NO on three typical samples of C2, C6 and C6-<sub>10:115</sub> are shown in Fig. S2. As the temperature was increased from 50 to 700 °C, NO desorption was observed on these samples. All the samples showed three main temperature ranges ( $\alpha$ ,  $\beta$  and  $\gamma$ ), suggesting that NO adsorbed on three different sites [1]. The low temperature peak  $\alpha$  was ascribed to the desorption of NO from weakly bonded sites and the peak  $\beta$  and  $\gamma$  in high temperature range was due to the strongly adsorbed species, i.e., nitrates [2]. The NO desorption amount was consistent with NO capacities of these sorbents.

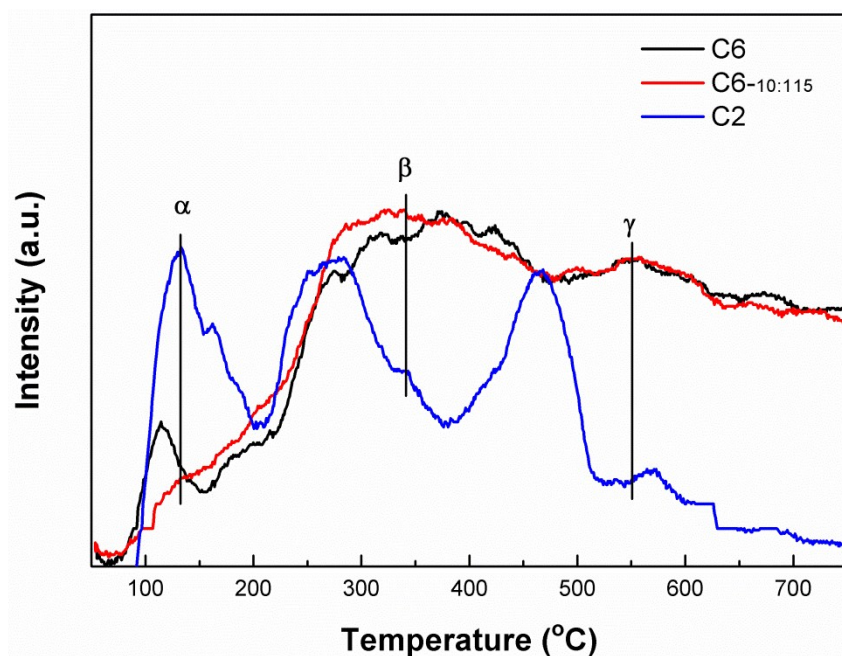

Fig. S2 TPD profiles of C2, C6 and C6-<sub>10:115</sub>.

**Table S2** Peak area of different catalysts based on H<sub>2</sub>-TPR results.

| Catalyst              | C6-125EG | C6-10:115 | C6-20:105 | C6-60:65 | C6-105:20 | C6-125H2O |
|-----------------------|----------|-----------|-----------|----------|-----------|-----------|
| Peak area<br>$\alpha$ | 312      | 501       | 820       | 0        | 0         | 0         |
| Peak area<br>$\beta$  | 5427     | 7157      | 6406      | 3266     | 3290      | 1918      |
| Peak area<br>$\gamma$ | 1553     | 1183      | 557       | 660      | 300       | 301       |

## References

- [1] J. Xu, Y. J. Wang and Y. F. Zhu, *Langmuir*, 2013, **29**, 10566.
- [2] B. Azambre, L. Zenbourny, A. Koch and J. V. Weber, *J. Phys. Chem. C*, 2009, **113**, 13287.
